# Supplementary material for: Triphase photocatalytic water-gas-shift reaction for hydrogen production with enhanced interfacial diffusion at gas–liquid–solid interfaces
Source: Royal Society of Chemistry journal article supplement (doi:10.1039/d3im00135k), 2024-01-01
Supplement: d3im00135k1.pdf [file d3im00135k1.pdf]

Triphase photocatalytic water-gas-shift reaction for hydrogen production  
with enhanced interfacial diffusion at gas-liquid-solid interfaces

Huige Chen,<sup>ab</sup> Zhenhua Li,<sup>a</sup> Chao Zhou,<sup>a</sup> Run Shi\*<sup>a</sup> and Tierui Zhang\*<sup>ab</sup>

<sup>a</sup> Key Laboratory of Photochemical Conversion and Optoelectronic Materials,  
Technical Institute of Physics and Chemistry, Chinese Academy of Sciences, Beijing  
100190, China.

<sup>b</sup> Center of Materials Science and Optoelectronics Engineering, University of Chinese  
Academy of Sciences, Beijing 100049, China.

Table of Contents

Figures S1-S14

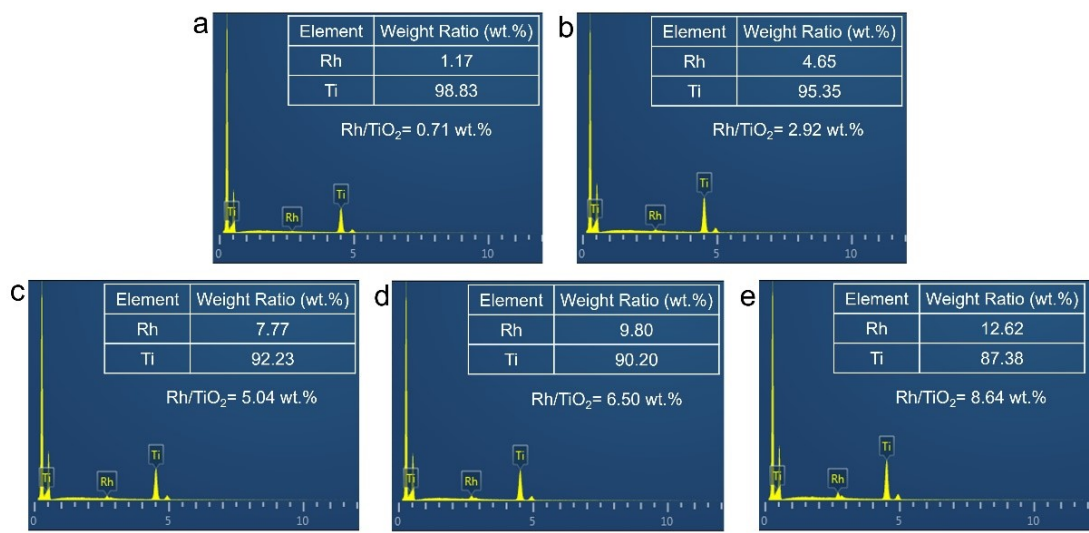

Fig. S1 EDS elemental analysis of the  $x$  wt.% Rh/TiO<sub>2</sub> ( $x = 1, 3, 5, 7, \text{ and } 9$ ).

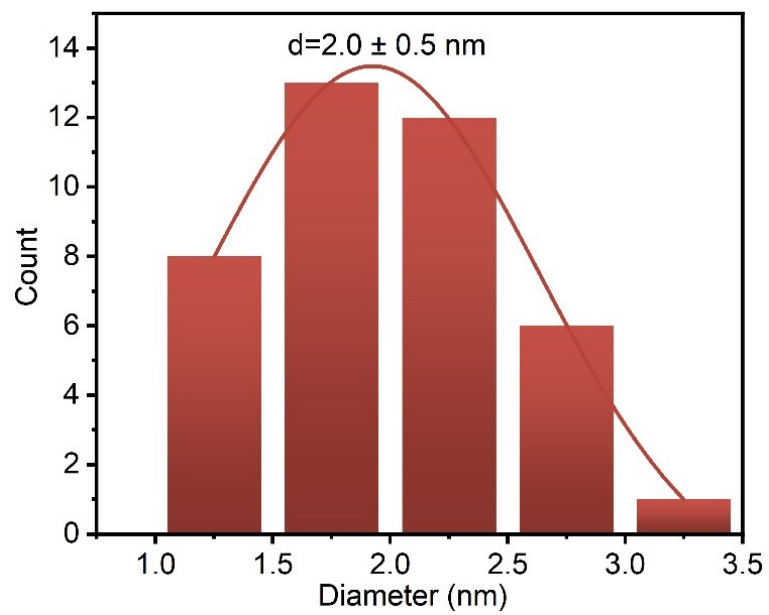

Fig. S2 Rh particle size distribution of Rh/TiO<sub>2</sub>.

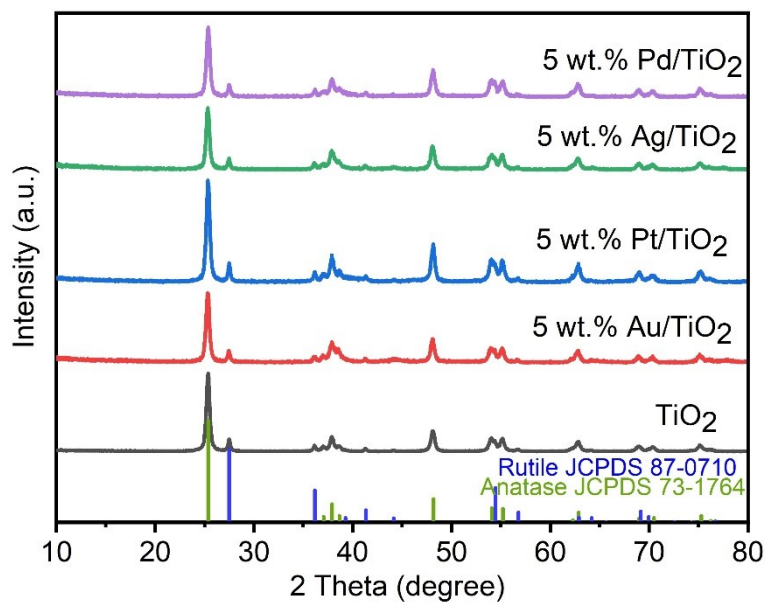

Fig. S3 XRD patterns of pristine TiO<sub>2</sub> and 5 wt.% M/TiO<sub>2</sub> (M = Au, Ag, Pt, and Pd) photocatalysts.

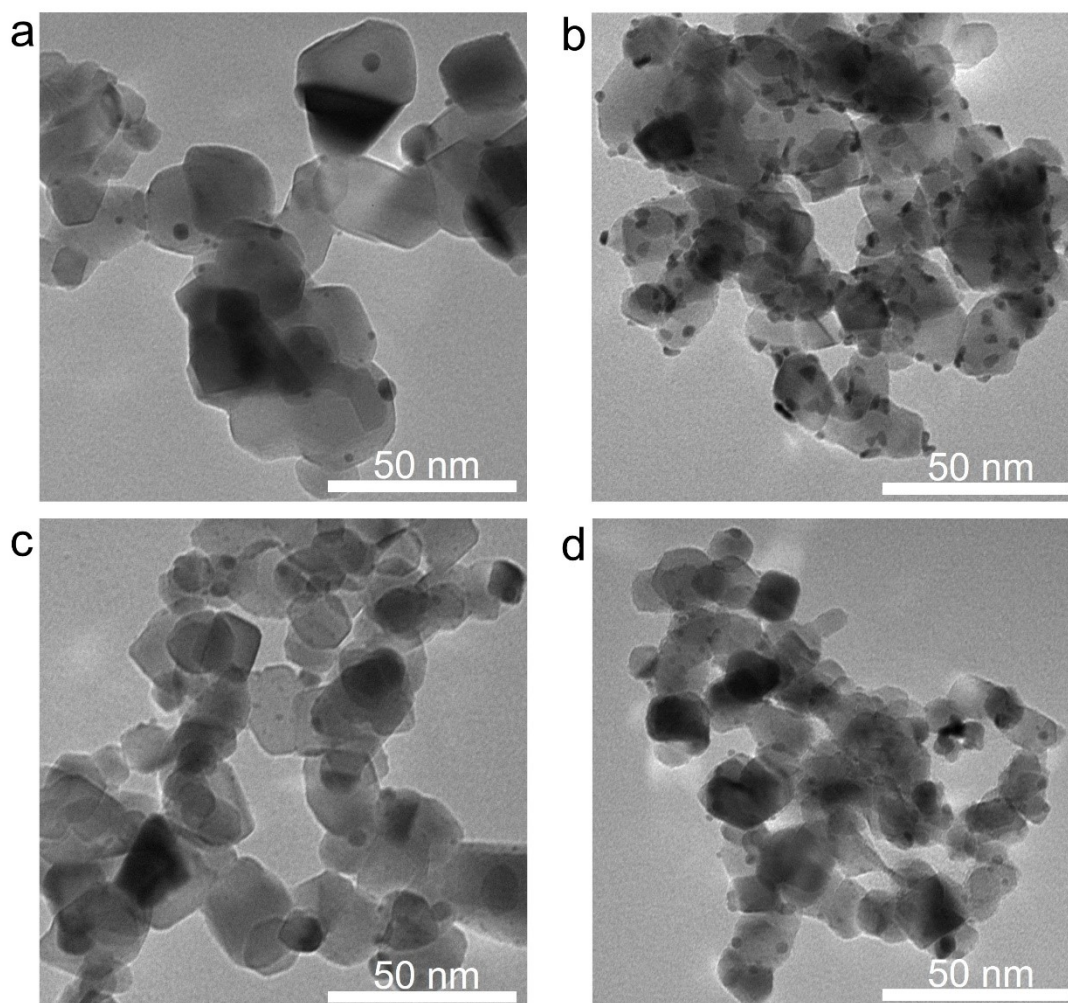

Fig. S4 TEM images of (a) 5 wt.% Au/TiO<sub>2</sub>, (b) 5 wt.% Pt/TiO<sub>2</sub>, (c) 5 wt.% Ag/TiO<sub>2</sub>, and (d) 5 wt.% Pd/TiO<sub>2</sub>.

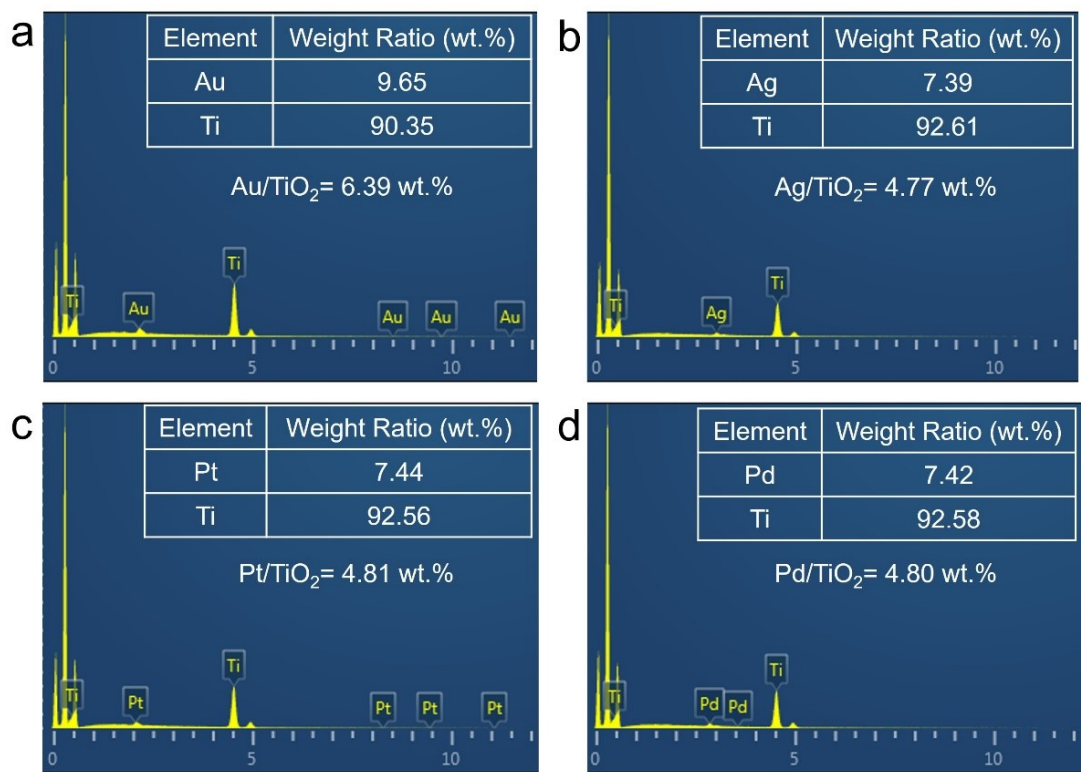

Fig. S5 EDS elemental analysis of the 5 wt.% Au/TiO<sub>2</sub> (a), 5 wt.% Ag/TiO<sub>2</sub> (b), 5 wt.% Pt/TiO<sub>2</sub> (c), 5 wt.% Pd/TiO<sub>2</sub> (d).

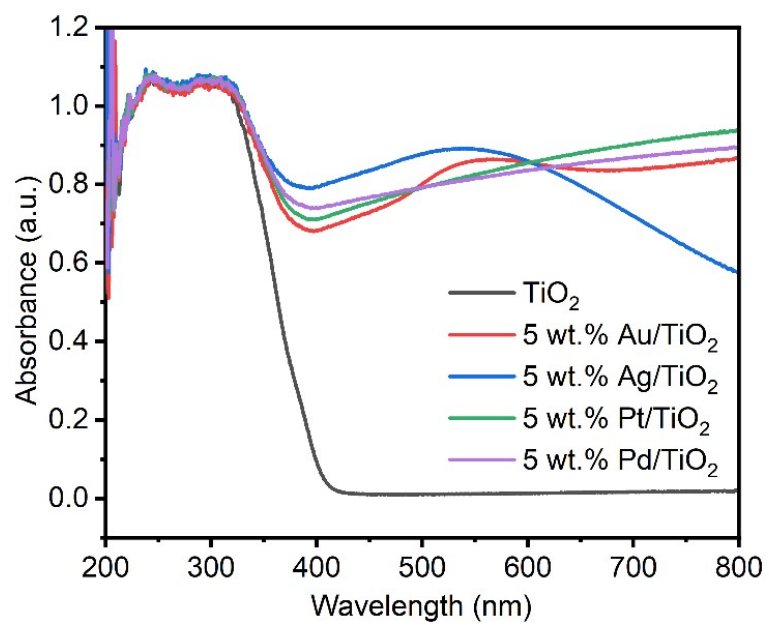

Fig. S6 Absorption spectra for 5 wt.% M/TiO<sub>2</sub> (M = Au, Ag, Pt, and Pd).

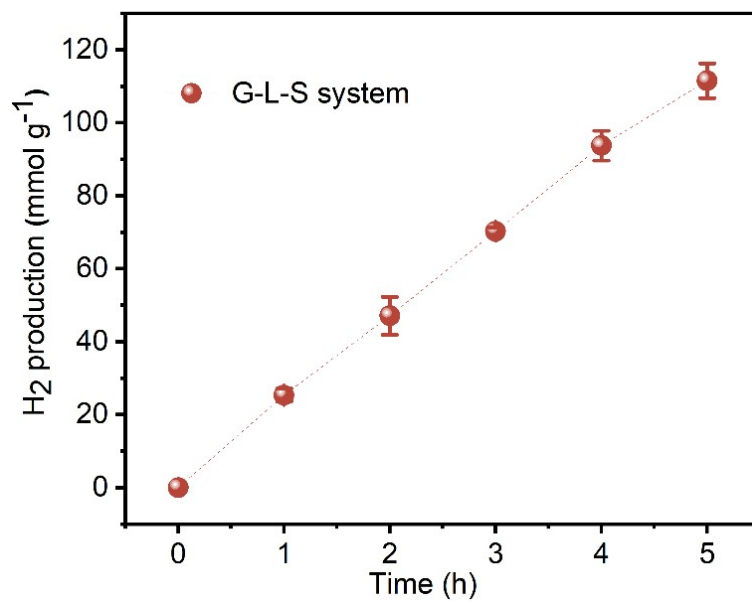

Fig. S7 Time-dependent H<sub>2</sub> production for Rh/TiO<sub>2</sub>. Error bars represent the standard deviation from at least three independent measurements.



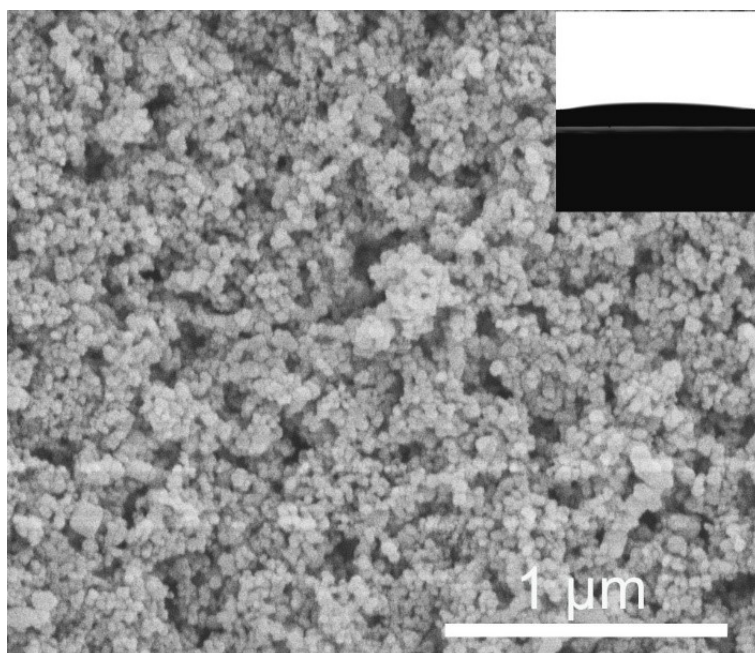

Fig. S8 Top-view SEM image of Rh/TiO<sub>2</sub>-GDL after photocatalytic WGS reaction for 10 cycles. Insert shows photographs of a water droplet on the sample.

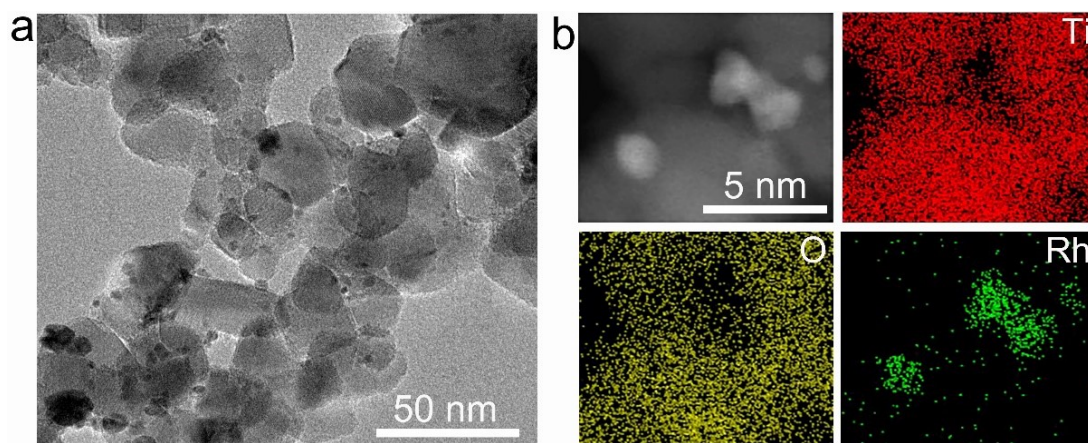

Fig. S9 (a) TEM image and (b) HAADF-STEM image and corresponding EDS element maps of Rh/TiO<sub>2</sub> after photocatalytic WGS reaction for 10 cycles.

a

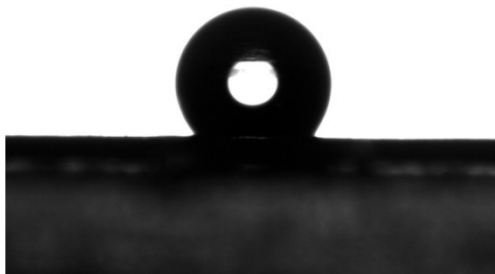

b

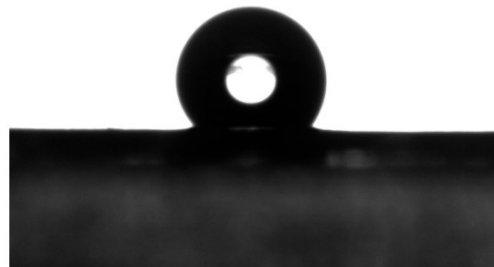

Fig. S10 Photographs of a water droplet on the GDL porous substrate before (a) and after (b) photocatalytic WGS reaction for 10 cycles.

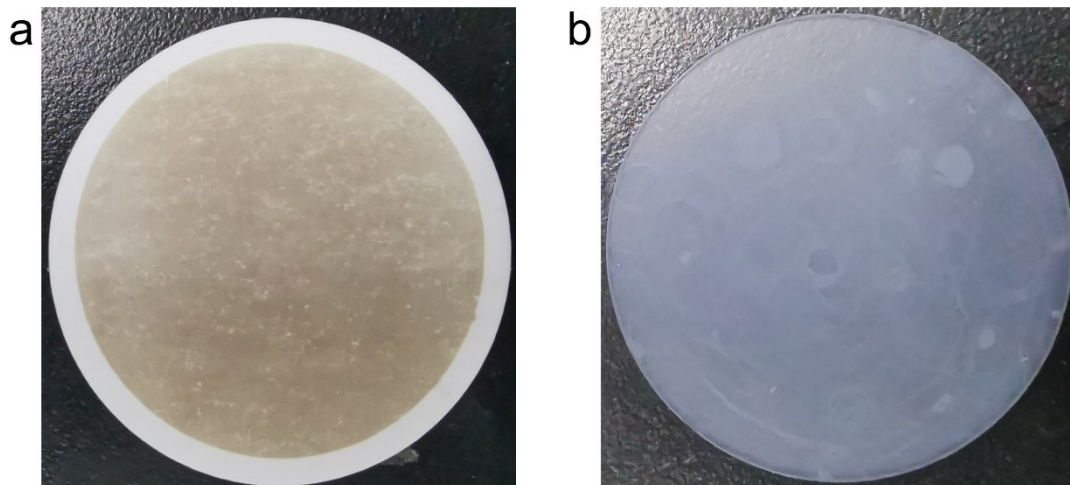

Fig. S11 Photographs of (a) Rh/TiO<sub>2</sub>-GDL for the G-L-S and G-S systems and (b) Rh/TiO<sub>2</sub>-immobilized quartz plate for the L-S system.

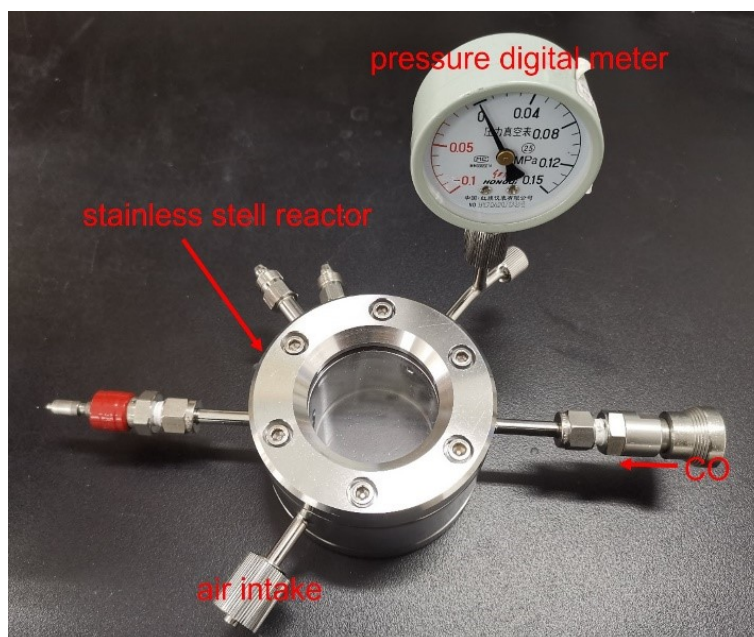

Fig. S12 Photograph of the photocatalytic reactor.

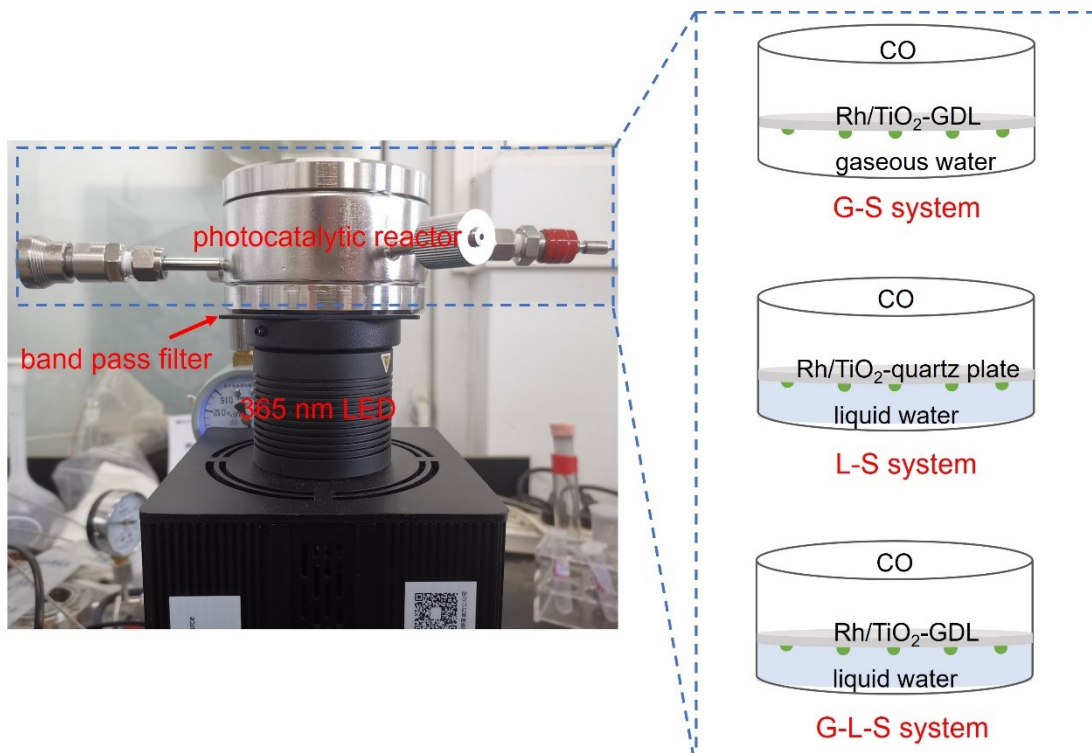

Fig. S13 Reactor setup and configurations for the three photocatalytic WGS reaction systems.

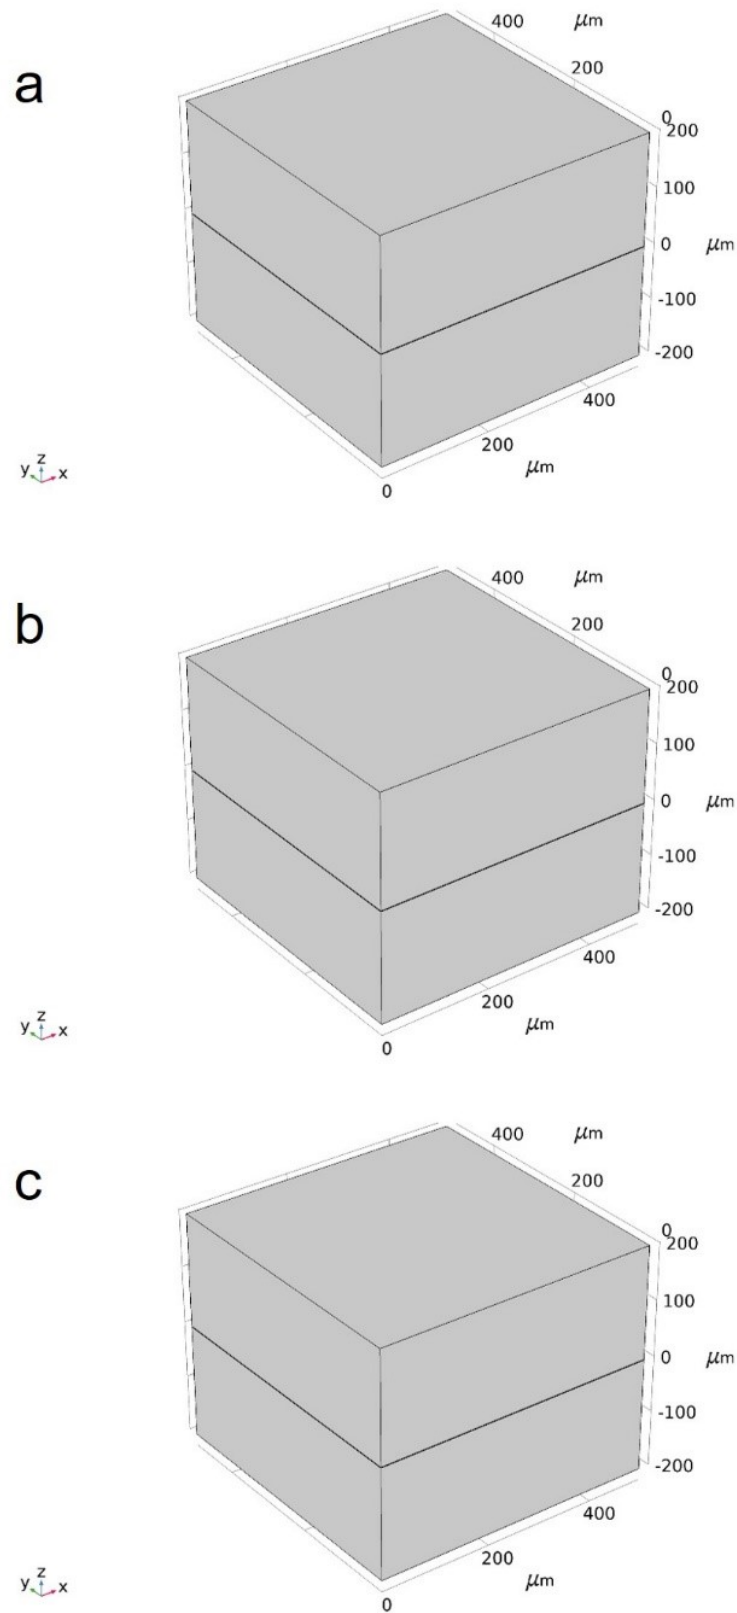

Fig. S14 Three-dimensional geometric models used for the FEM simulation of (a) G-S, (b) L-S, and (c) G-L-S systems.
